# Supplementary material for: Dietary Flavonoids and Human Cognition: A Meta‐Analysis
Source: PubMed Central journal article supplement (PMC9787524; doi:10.1002/mnfr.202100976), 2022-04-07
Supplement: MNFR-66-2100976-s001.pdf [file MNFR-66-2100976-s001.pdf]

## Supplementary Information

**Table S1: Effect of flavonoids on cognition by flavonoid source**

| Flavonoid Source | k  | Mean weighted g | 95% CI (lower limit, upper limit) | p                |
|------------------|----|-----------------|-----------------------------------|------------------|
| Berry            | 23 | 0.149           | 0.038, 0.261                      | <b>0.009</b>     |
| Citrus           | 3  | 0.065           | -0.242, 0.371                     | 0.679            |
| Cocoa            | 11 | 0.224           | 0.014, 0.434                      | <b>0.036</b>     |
| Ginkgo           | 22 | 0.187           | 0.103, 0.271                      | <b>&lt;0.001</b> |
| Pine Bark        | 2  | 0.011           | -0.347, 0.370                     | 0.950            |
| Soya             | 15 | 0.054           | -0.055, 0.162                     | 0.331            |
| Tea              | 2  | 0.093           | -0.228, 0.414                     | 0.571            |
| Other            | 2  | 0.119           | -0.289, 0.527                     | 0.568            |

**Table S2: Effect of flavonoids on cognition by acute or chronic design**

| Acute or Chronic Study Design | k  | Mean weighted g | 95% CI (lower limit, upper limit) | p                |
|-------------------------------|----|-----------------|-----------------------------------|------------------|
| Acute                         | 31 | 0.094           | -0.002, 0.190                     | 0.055            |
| Chronic                       | 51 | 0.151           | 0.081, 0.221                      | <b>&lt;0.001</b> |

**Table S3: Effect of flavonoids on cognition by duration of supplementation**

| Duration of flavonoid supplementation | k  | Mean weighted g | 95% CI (lower limit, upper limit) | p            |
|---------------------------------------|----|-----------------|-----------------------------------|--------------|
| ≤ 24 hours                            | 31 | 0.094           | -0.002, 0.190                     | 0.055        |
| > 24h ≤ 6 weeks                       | 3  | -0.020          | -0.367, 0.328                     | 0.912        |
| > 6 weeks ≤ 3 months                  | 31 | 0.150           | 0.058, 0.243                      | <b>0.001</b> |
| > 3 months                            | 19 | 0.154           | 0.040, 0.267                      | <b>0.008</b> |

**Table S4: Effect of flavonoids on cognition by participant age group**

| Age group          | k  | Mean weighted g | 95% CI (lower limit, upper limit) | p            |
|--------------------|----|-----------------|-----------------------------------|--------------|
| Children           | 5  | 0.171           | -0.074, 0.416                     | 0.172        |
| Young Adults       | 24 | 0.088           | -0.018, 0.194                     | 0.105        |
| Middle-aged Adults | 22 | 0.112           | 0.007, 0.217                      | <b>0.037</b> |

|                     |    |       |              |              |
|---------------------|----|-------|--------------|--------------|
| <b>Older Adults</b> | 29 | 0.176 | 0.074, 0.278 | <b>0.001</b> |
|---------------------|----|-------|--------------|--------------|

**Table S5: Effect of flavonoids on cognition by participant cognitive health status**

| <b>Cognitive Health Status</b> | <b>k</b> | <b>Mean weighted g</b> | <b>95% CI (lower limit, upper limit)</b> | <b>p</b>         |
|--------------------------------|----------|------------------------|------------------------------------------|------------------|
| <b>Healthy</b>                 | 72       | 0.103                  | 0.048, 0.158                             | <b>&lt;0.001</b> |
| <b>Cognitively Unhealthy</b>   | 8        | 0.306                  | 0.143, 0.469                             | <b>&lt;0.001</b> |

**Table S6: Effect of flavonoids on cognition by flavonoid dose**

| <b>Flavonoid Dose</b> | <b>k</b> | <b>Mean weighted g</b> | <b>95% CI (lower limit, upper limit)</b> | <b>p</b>         |
|-----------------------|----------|------------------------|------------------------------------------|------------------|
| <b>Low</b>            | 46       | 0.094                  | 0.020, 0.168                             | <b>0.013</b>     |
| <b>Medium</b>         | 31       | 0.162                  | 0.092, 0.232                             | <b>&lt;0.001</b> |
| <b>High</b>           | 13       | 0.100                  | -0.046, 0.245                            | 0.181            |

**Table S7: Summary of comparative analyses showing between subgroup heterogeneity**

| <b>Moderator</b>                             | <b>Q</b>      | <b>p</b>     |
|----------------------------------------------|---------------|--------------|
| <b>Flavonoid Source</b>                      | Q(7) = 5.109  | 0.647        |
| <b>Duration of flavonoid supplementation</b> | Q(3) = 1.604, | 0.659        |
| <b>Age group</b>                             | Q(3) = 1.605  | 0.658        |
| <b>Cognitive Health Status</b>               | Q(1) =5.319   | <b>0.021</b> |
